# Supplementary material for: Design of Chitosan-Coated, Quercetin-Loaded PLGA Nanoparticles for Enhanced PSMA-Specific Activity on LnCap Prostate Cancer Cells
Source: MDPI journal article supplement (doi:10.3390/biomedicines11041201), 2023-04-18
Supplement: s1 [file s1]

Supplementary Material

# Design of Chitosan-Coated, Quercetin-Loaded PLGA Nanoparticles for Enhanced PSMA-Specific Activity on LnCap Prostate Cancer Cells

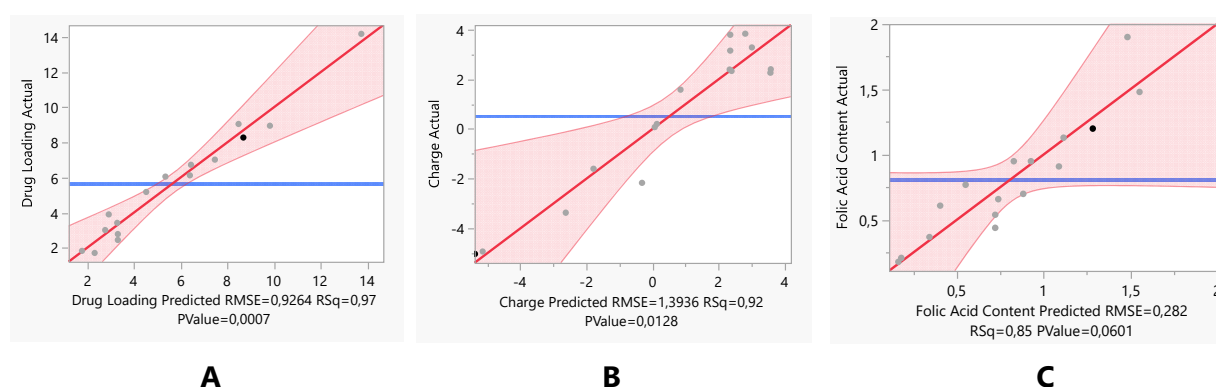

**Figure S1.** Actual vs Predicted plots of quercetin loading (A), charge (B) and folic acid content (C) – from JMP V17

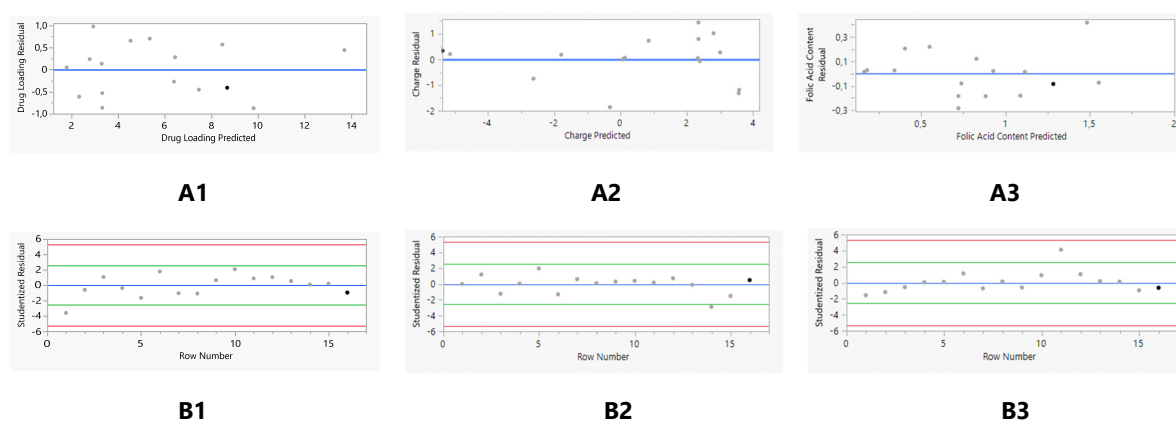

**Figure S2.** Residual Predicted plots (A) and Studentized Residuals (B) of quercetin loading (1), charge (2) and folic acid content (3) - from JMP V17

| Source                | Logworth |  | PValue  |
|-----------------------|----------|--|---------|
| Quercetin(10,30)      | 3,937    |  | 0,00012 |
| Folic Acid(15,45)     | 2,983    |  | 0,00104 |
| Chitosan(10,60)       | 2,470    |  | 0,00338 |
| Quercetin*Quercetin   | 2,387    |  | 0,00410 |
| Quercetin*Chitosan    | 1,536    |  | 0,02912 |
| Chitosan*Chitosan     | 1,313    |  | 0,04861 |
| Folic Acid*Folic Acid | 1,251    |  | 0,05614 |
| Chitosan*Folic Acid   | 0,601    |  | 0,25083 |
| Quercetin*Folic Acid  | 0,243    |  | 0,57098 |

**Figure S3.** Main effects data obtained using a central composite design – from JMP V17

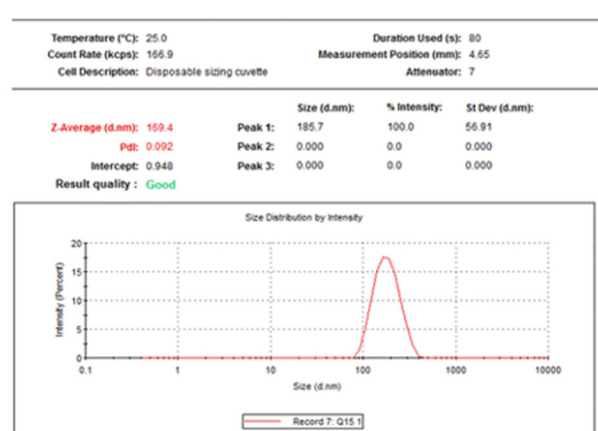

**A1**

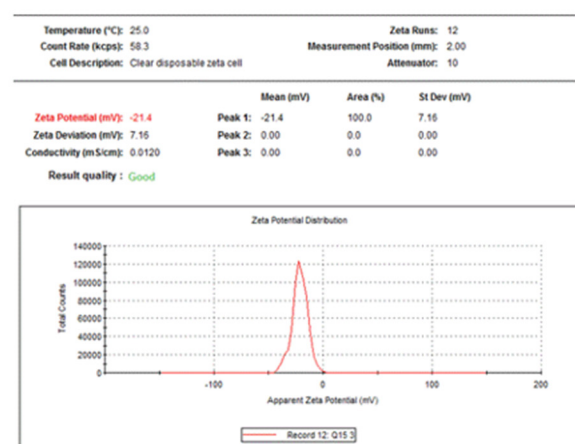

**A2**

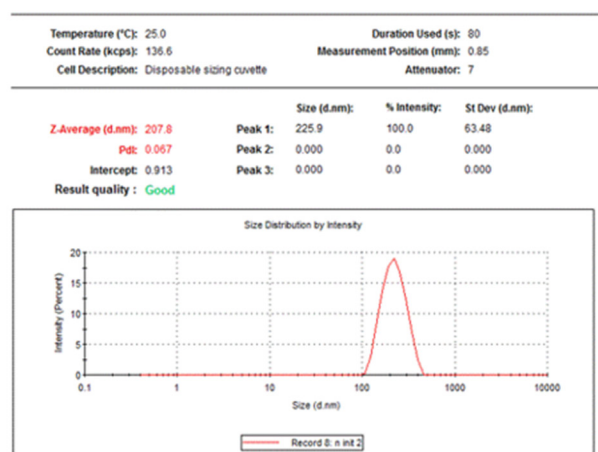

**B1**

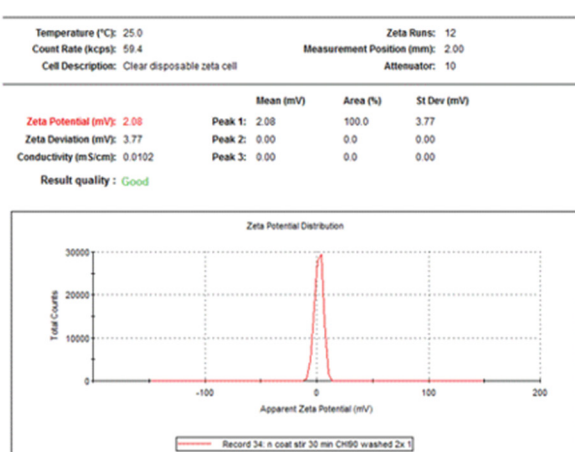

**B2**

**Figure S4.** 1-2: Representative Graphs of Size and Potential of **A-** un-coated nanoparticles and **B-** coated nanoparticles.

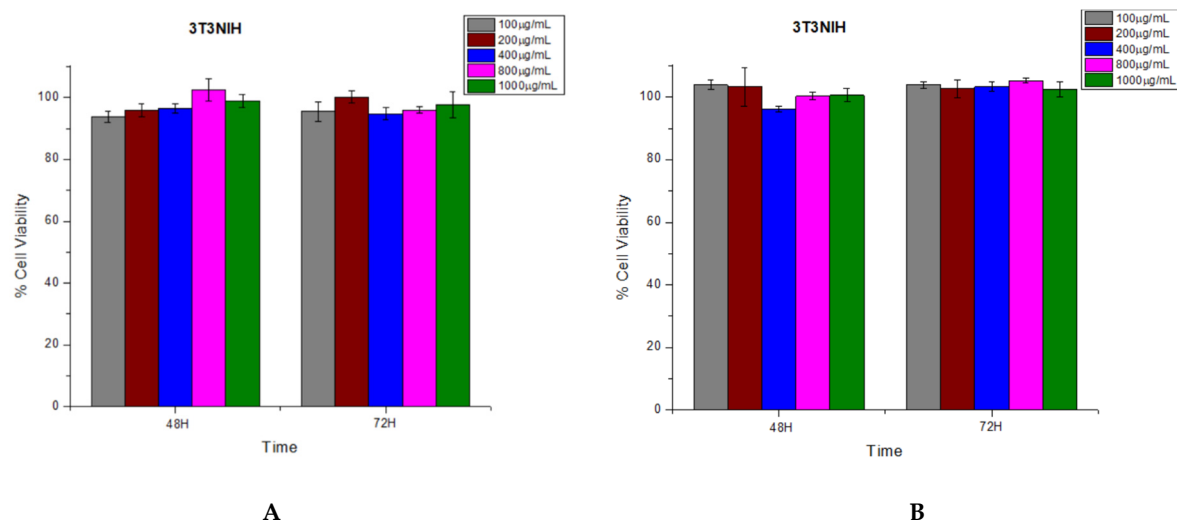

**Figure S5.** Cell viability of 3T3-NIH cells after being treated with unloaded unloaded (A) and coated (B) nanoparticles for 48 and 72 hours
